# Supplementary material for: Ni(ii) dithiolate anion composites with two-dimensional materials for electrochemical oxygen evolution reactions (OERs)
Source: Royal Society of Chemistry journal article supplement (doi:10.1039/d1nj02644e), 2021-01-01
Supplement: d1nj02644e1.pdf [file d1nj02644e1.pdf]

## Electronic Supporting Information

### Ni(II) dithiolate anion composites with two-dimensional materials for electrochemical oxygen evolution reactions (OER)

Ayushi Singh<sup>a</sup>, Amita Singh<sup>a,b</sup>, Gabriele Kociok-Köhn<sup>c</sup>, Kieran C. Molloy<sup>d</sup>, Ashish Kumar Singh<sup>e\*</sup>, Abhinav Kumar<sup>a\*</sup> and Mohd. Muddassir<sup>f</sup>

#### *Synthesis of [Ni(S<sub>2</sub>C<sub>2</sub>Ph<sub>2</sub>)<sub>2</sub>]*

Benzoin (2.12 g, 10 mmol) was refluxed with P<sub>2</sub>S<sub>5</sub> (3.33 g, 15 mmol) in 30 ml of dioxane for 2 h. During this period, the thiophosphoric ester of dithiobenzoin was formed. The hot reaction mixture was filtered to remove the excess P<sub>2</sub>S<sub>5</sub> and a solution of NiCl<sub>2</sub>·6H<sub>2</sub>O (1.16 g, 4.9 mmol) in 8 ml distilled water was added to the filtrate. The reaction mixture was heated on steam bath for 2 h. Black crystal of the complex was formed which were collected filtration, washed with a minimal amount of dioxane, water, ethanol, and finally with diethyl ether. Purification was conducted by recrystallization from boiling toluene to afford 1.63 g of green-black crystals, (0.325 g, yield 60%). C<sub>28</sub>H<sub>20</sub>S<sub>4</sub>Ni (541.98): calcd. C, 61.89, H, 3.71, S, 23.60; found: C, 61.74; H, 3.63; S, 23.23 %. <sup>1</sup>H NMR (CDCl<sub>3</sub>, δ): 7.26, (d, 4H), 7.28 (d, 4H), 7.34-7.35 (m, 8H), 7.38-7.39 (m, 4H). <sup>13</sup>C NMR (CDCl<sub>3</sub>, δ): 128.4, 128.8, 128.9, 141.2 (C<sub>6</sub>H<sub>5</sub>), 181.5 (C=C). IR (KBr, cm<sup>-1</sup>): 1571, 1493, 1442, 1361, 1138, 882, 749, 696, 409. UV-Vis (CH<sub>2</sub>Cl<sub>2</sub>, nm) λ<sub>max</sub>: 270, 317, 598, 857.

## Electronic Supporting Information

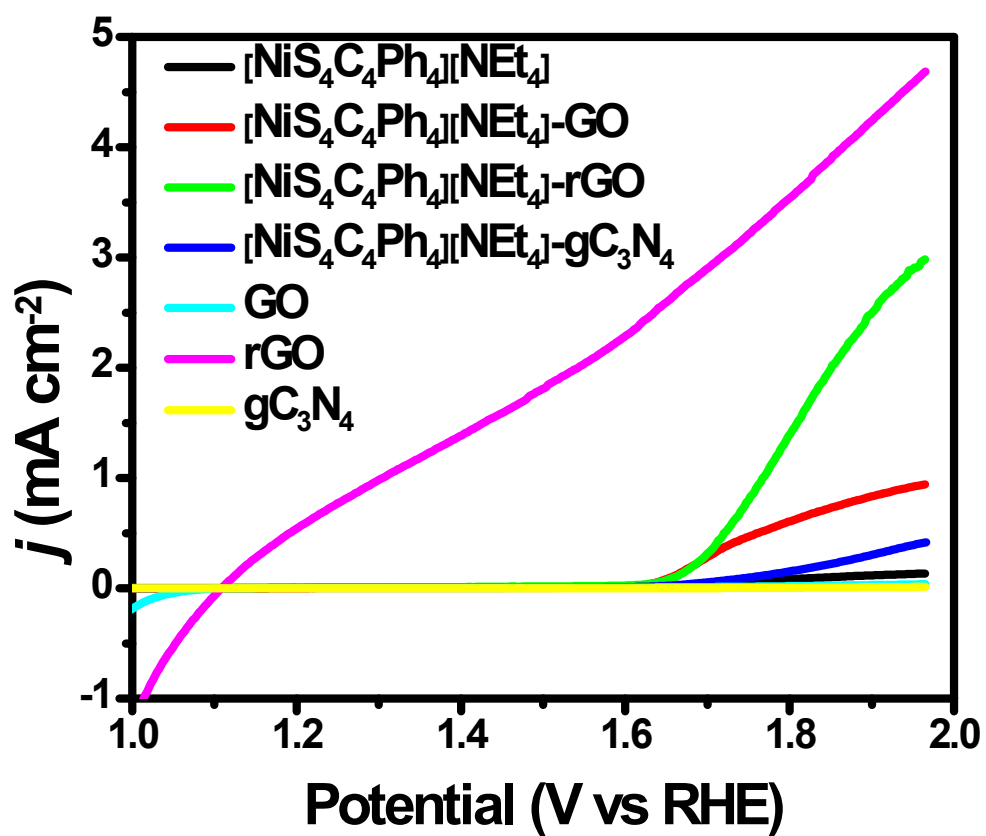

Fig. S1: LSV profile of 1, its composite with 2D materials and 2D materials.
